# Supplementary material for: Chloromethylated polystyrene immobilized ruthenium complex of 2-(2-pyridyl)benzimidazole catalyst for the synthesis of bioactive disubstituted ureas by carbonylation reaction
Source: Royal Society of Chemistry journal article supplement (doi:10.1039/c8nj00475g), 2018-01-01

**Electronic supplementary information**

**Chloromethylated polystyrene immobilized ruthenium complex of 2-(2-Pyridyl)benzimidazole catalyst for the synthesis of bioactive disubstituted ureas by carbonylation reaction**

Tusar Kanto Dey,<sup>a</sup> Kajari Ghosh,<sup>b,‡</sup> Priyanka Basu,<sup>a, ‡</sup> Rostam Ali Molla,<sup>b</sup> and Sk. Manirul Islam<sup>a\*</sup>

<sup>a</sup>*Department of Chemistry, University of Kalyani, Kalyani, Nadia, 741235, W.B., India*

<sup>b</sup>*Department of Chemistry, University of Burdwan, Burdwan 713104, W.B., India*

<sup>‡</sup>*These Authors contributed equally*

---

| <b>Contents</b>                                               | <b>Pages</b> |
|---------------------------------------------------------------|--------------|
| <sup>1</sup> HNMR data and Copy of 2-(2-Pyridyl)benzimidazole | S2           |
| <sup>1</sup> HNMR data of the products listed in Table 4      | S3           |
| <sup>1</sup> HNMR Copies of products listed in Table 4        | S4-S8        |

# <sup>1</sup>HNMR of 2-(2-Pyridyl)benzimidazole

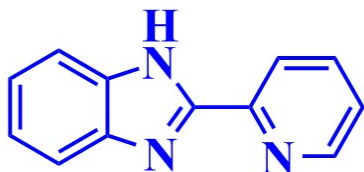

<sup>1</sup>HNMR (400 MHz, CDCl<sub>3</sub>): δ 7.263-7.326 (m, 2H), 7.368-7.402 (m, 1H), 7.483-7.522 (d, *J* = 15.6 Hz, 1H), 7.860-7.902 (m, 2H), 8.444-8.464 (d, *J* = 8 Hz, 1H), 8.368-8.653 (m, 1H), 10.896 (s, 1H) ppm.

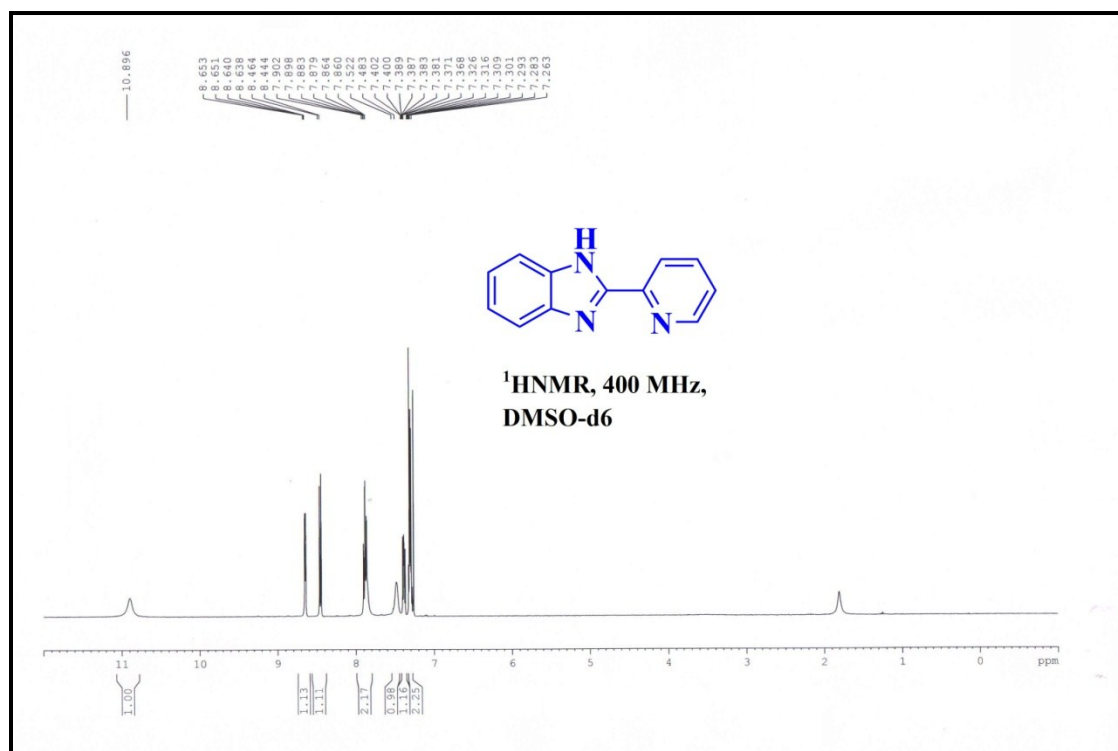

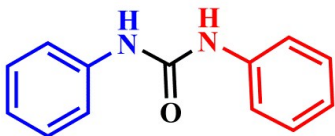

$^1\text{H}$ NMR (400 MHz, DMSO- $d_6$ ):  $\delta$  6.982-7.019 (t,  $J$  = 7.6 Hz, 2H), 7.220-7.298 (m, 4H), 7.428-7.448 (d,  $J$  = 8 Hz, 4H), 7.994 (s, 2H) ppm.

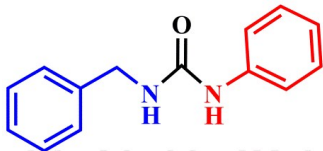

$^1\text{H}$ NMR (400 MHz, DMSO- $d_6$ ):  $\delta$  4.384-4.399 (d,  $J$  = 6Hz, 2H), 5.694 (s, 1H), 7.216-7.330 (m, 10H) ppm.

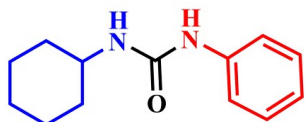

$^1\text{H}$ NMR (400 MHz, DMSO- $d_6$ ):  $\delta$  1.077-1.191 (m, 2H), 1.254-1.380 (m, 2H), 1.564-1.594 (t, 3.6 Hz, 1H), 1.663-1.695 (t, 3.6 Hz, 1H), 1.882-1.905 (d, 9.2 Hz, 1H), 3.492-3.511 (t, 3.6 Hz, 1H), 4.726 (s, 1H), 4.928-4.945 (d, 6.8 Hz, 1H), 6.975-7.012 (t, 7.2 Hz, 1H), 7.255-7.344 (m, 2H), 7.441-7.462 (d, 8.4 Hz, 2H) ppm.

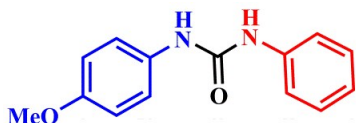

$^1\text{H}$ NMR (400 MHz, DMSO- $d_6$ ):  $\delta$  3.783 (s, 3H), 6.833-6.893 (m, 3H), 7.025-7.047 (d, 8.8 Hz, 1H), 7.177-7.223 (m, 3H), 7.470-7.490 (d, 8 Hz, 2H) ppm.

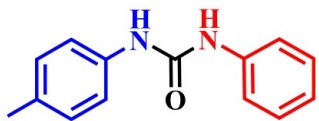

$^1\text{H}$ NMR (400 MHz, DMSO- $d_6$ ):  $\delta$  2.244 (s, 3H), 6.895-6.916 (d, 8.4 Hz, 3H), 7.005-7.122 (m, 3H), 7.261-7.353 (m, 4H), 8.524-8.553 (d, 11.6 Hz, 1H) ppm.

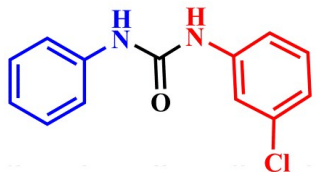

$^1\text{H}$ NMR (400 MHz, DMSO- $d_6$ ):  $\delta$  6.984-7.020 (t, 7.2 Hz, 2H), 7.260-7.300 (t, 8.4 Hz, 5H), 7.436-7.457 (d, 8.4 Hz, 4H), 7.993 (s, 1H) ppm.

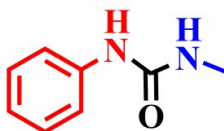

$^1\text{H}$ NMR (400 MHz, DMSO- $d_6$ ):  $\delta$  2.942 (s, 3H), 6.975-7.012 (t, 7.2 Hz, 1H), 7.255-7.295 (t, 8 Hz, 2H), 7.441-7.462 (d, 8.4 Hz, 2H), 8.123 (s, 1H) ppm.

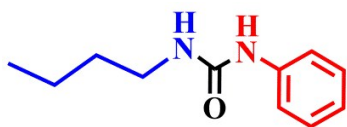

$^1\text{H}$ NMR (400 MHz, DMSO- $d_6$ ):  $\delta$  0.899-0.951 (m, 3H), 1.317-1.410 (m, 2H), 1.434-1.551 (m, 2H), 2.883-2.896 (d, 5.2 Hz, 2H), 4.501 (s, 1H), 5.747 (s, 1H), 6.955-7.004 (t, 8 Hz, 1H), 7.234-7.285 (t, 5.2 Hz, 2H), 7.411-7.431 (d, 8 Hz, 2H) ppm.

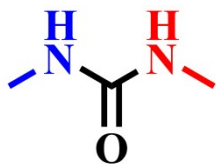

$^1\text{H}$ NMR (400 MHz,  $\text{CDCl}_3$ ):  $\delta$  2.737-2.757 (m, 6H), 5.483 (s, 2H) ppm.

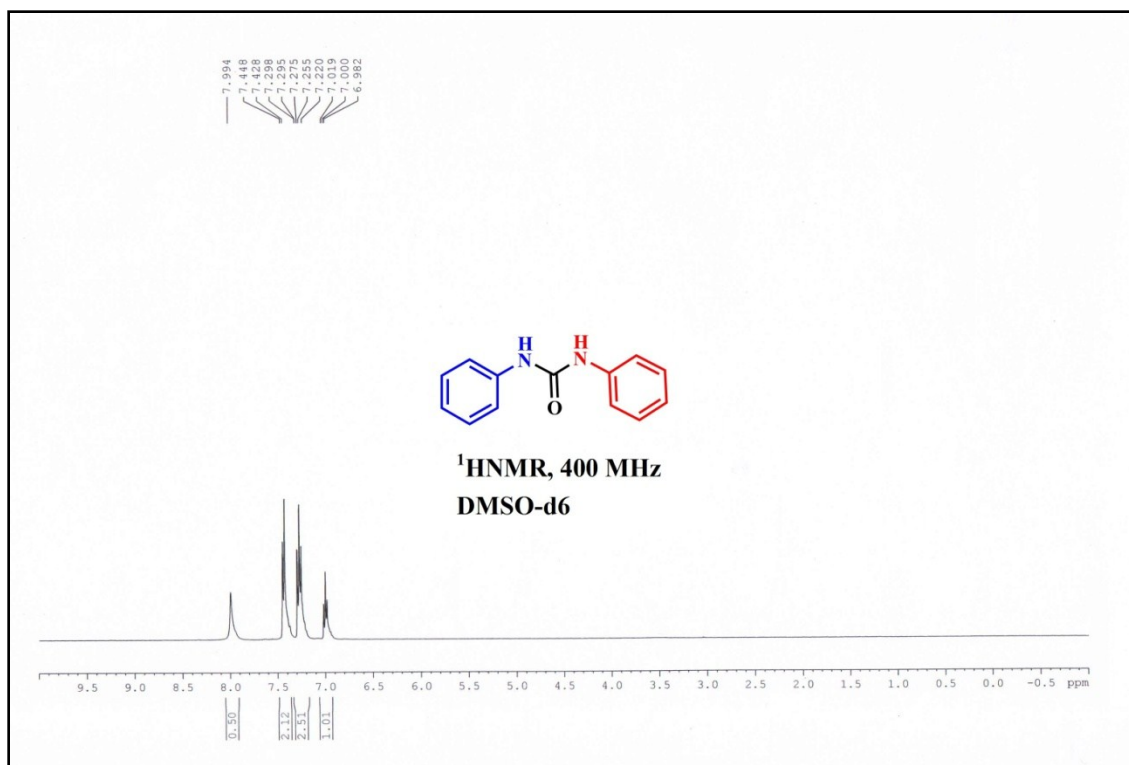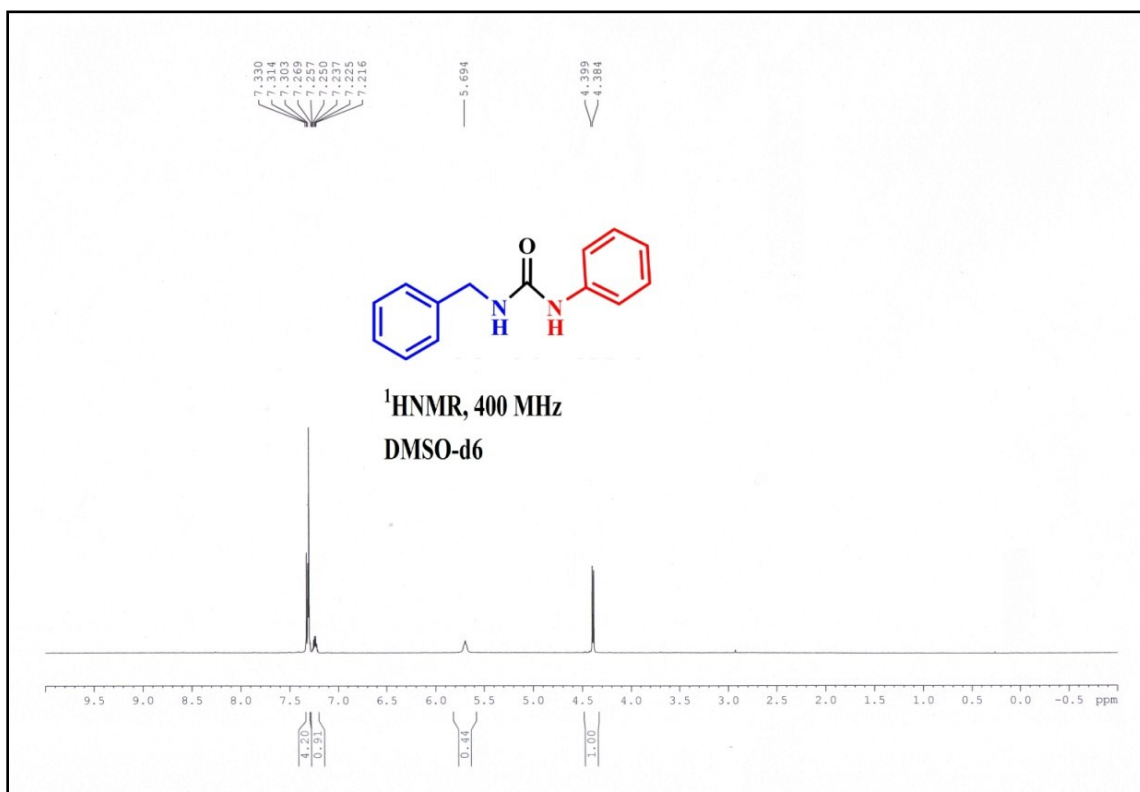

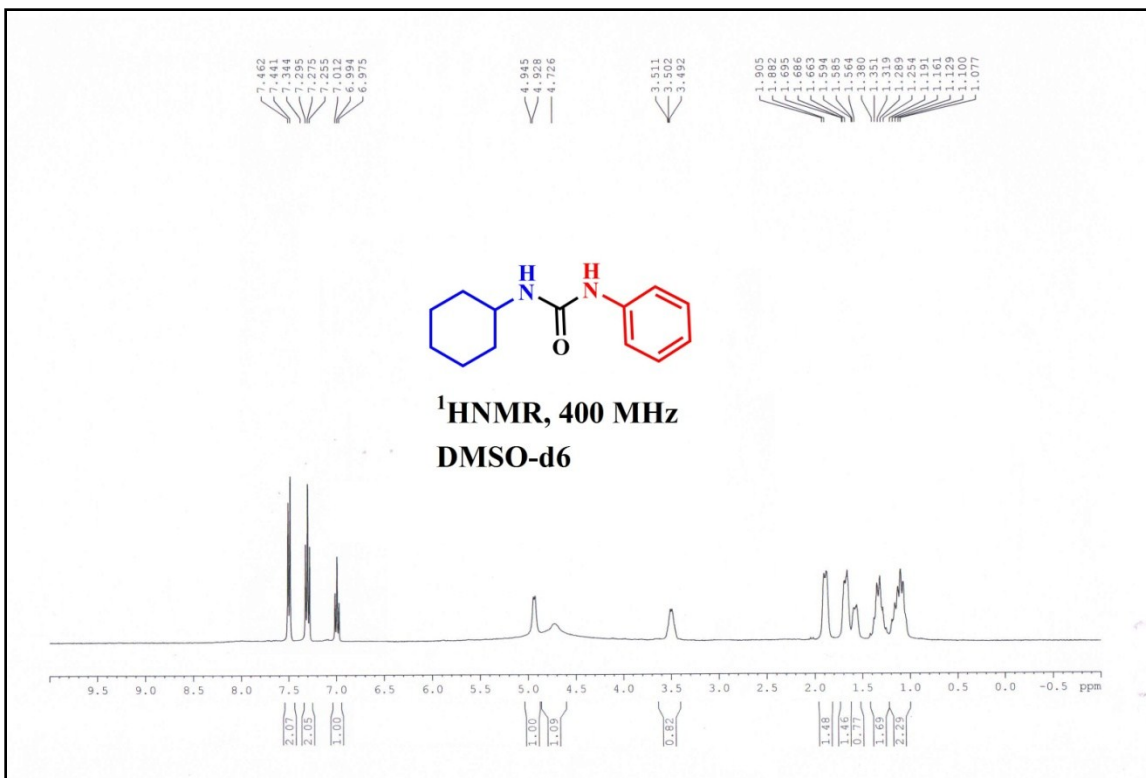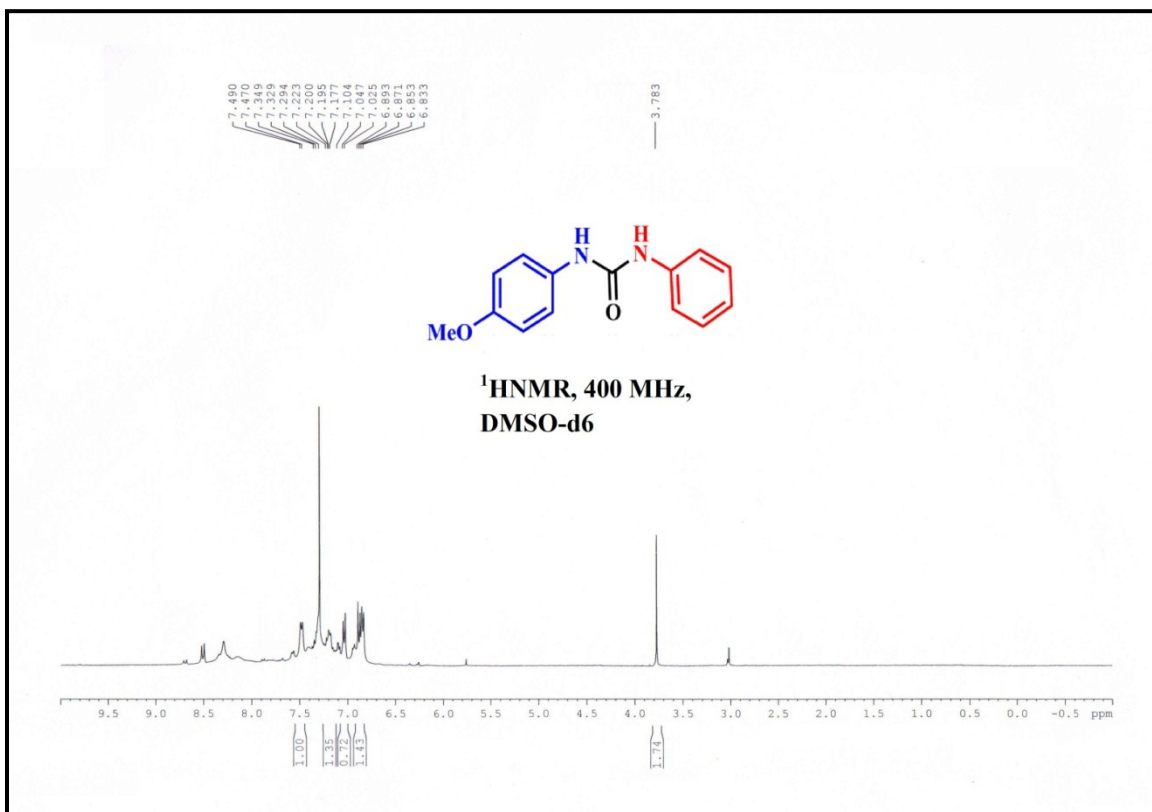

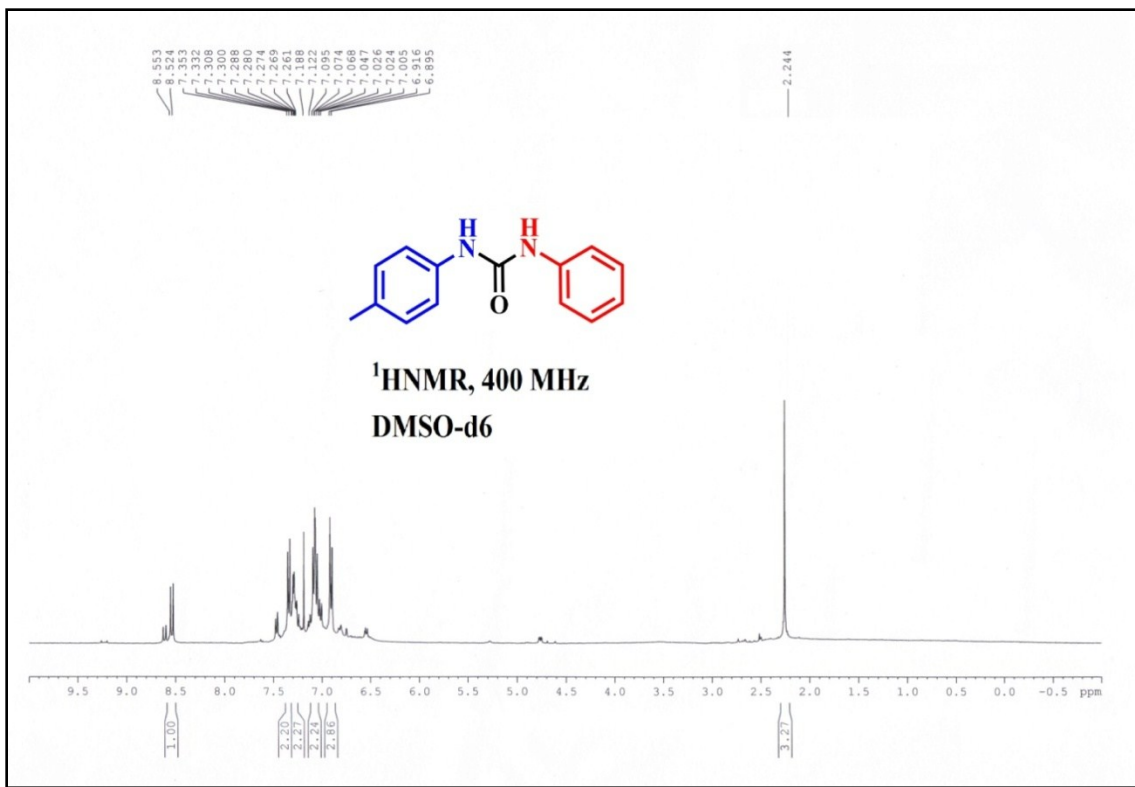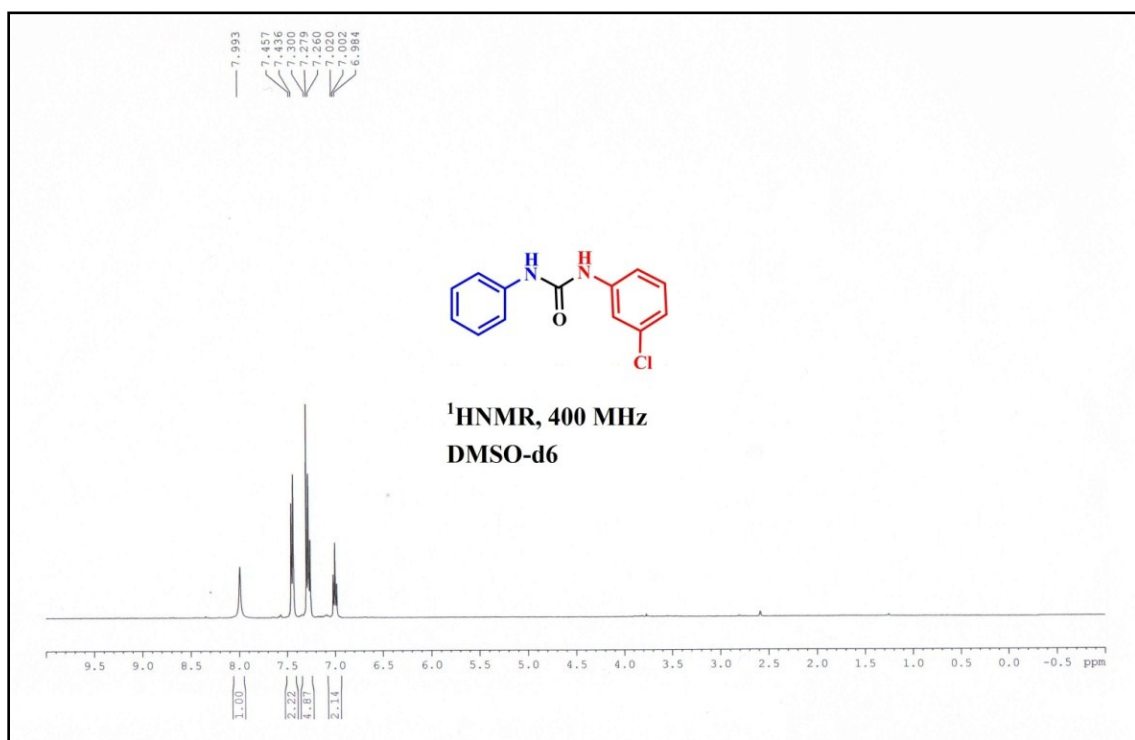

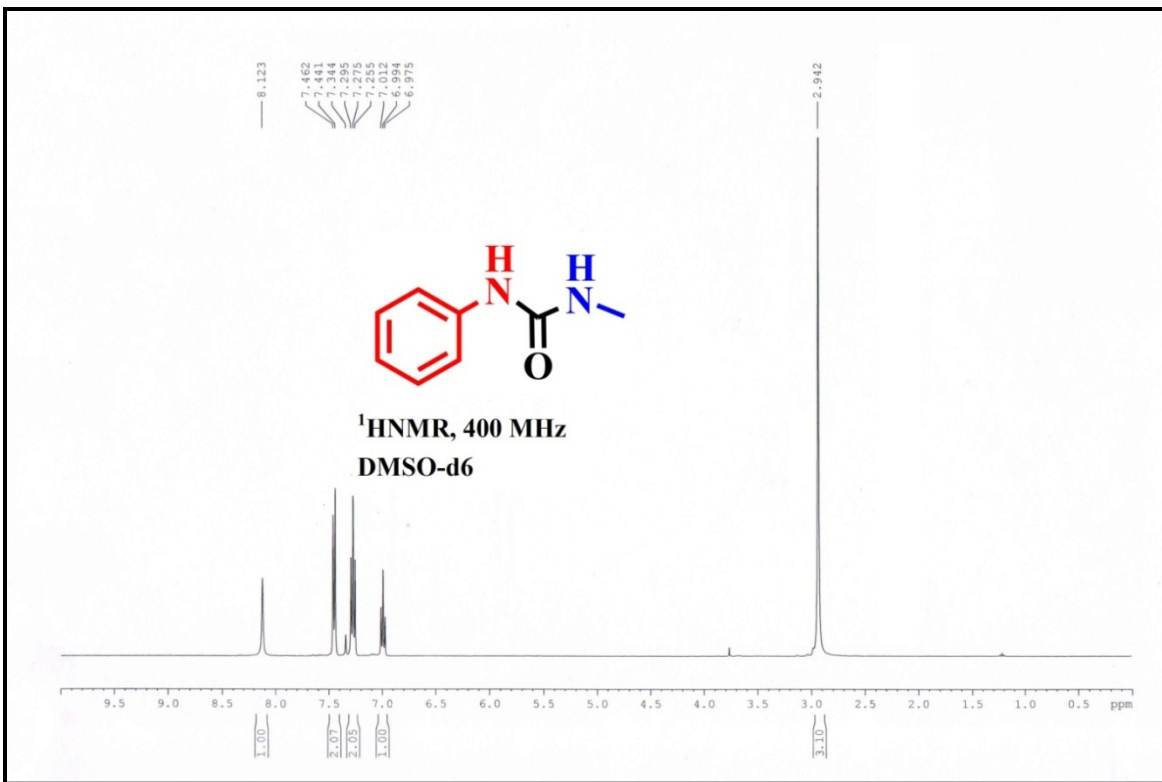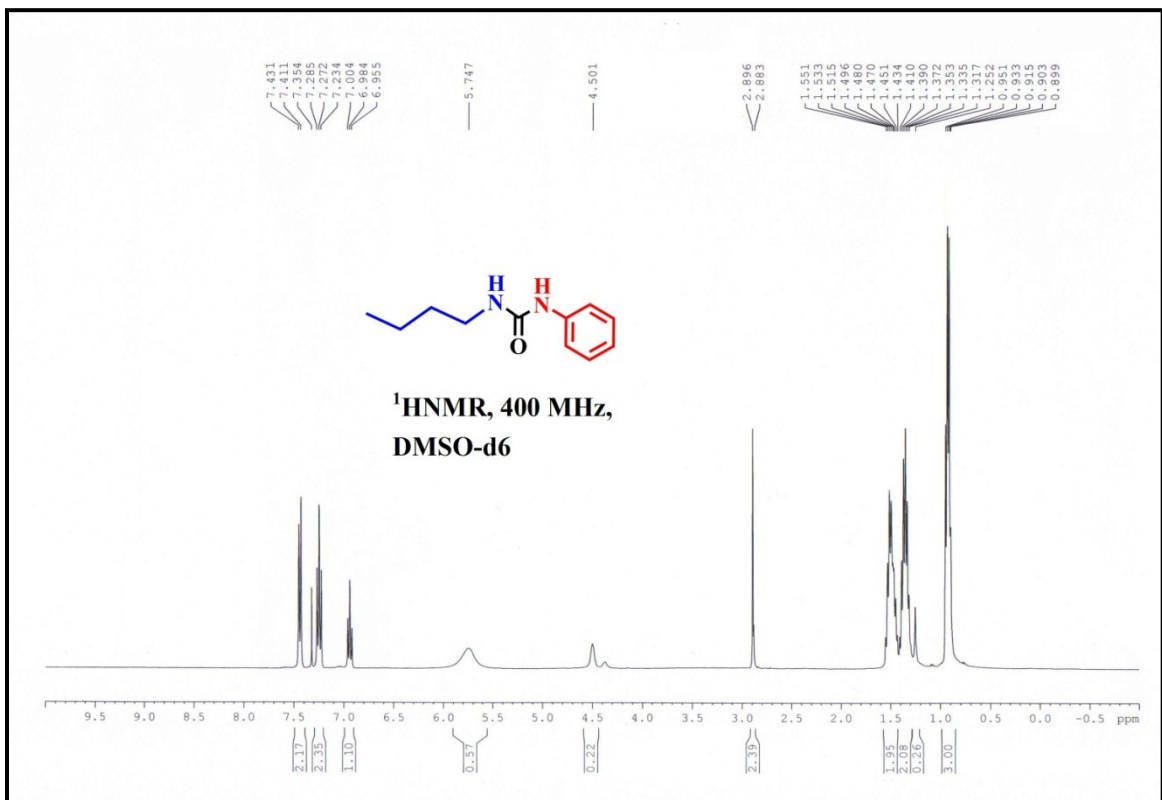



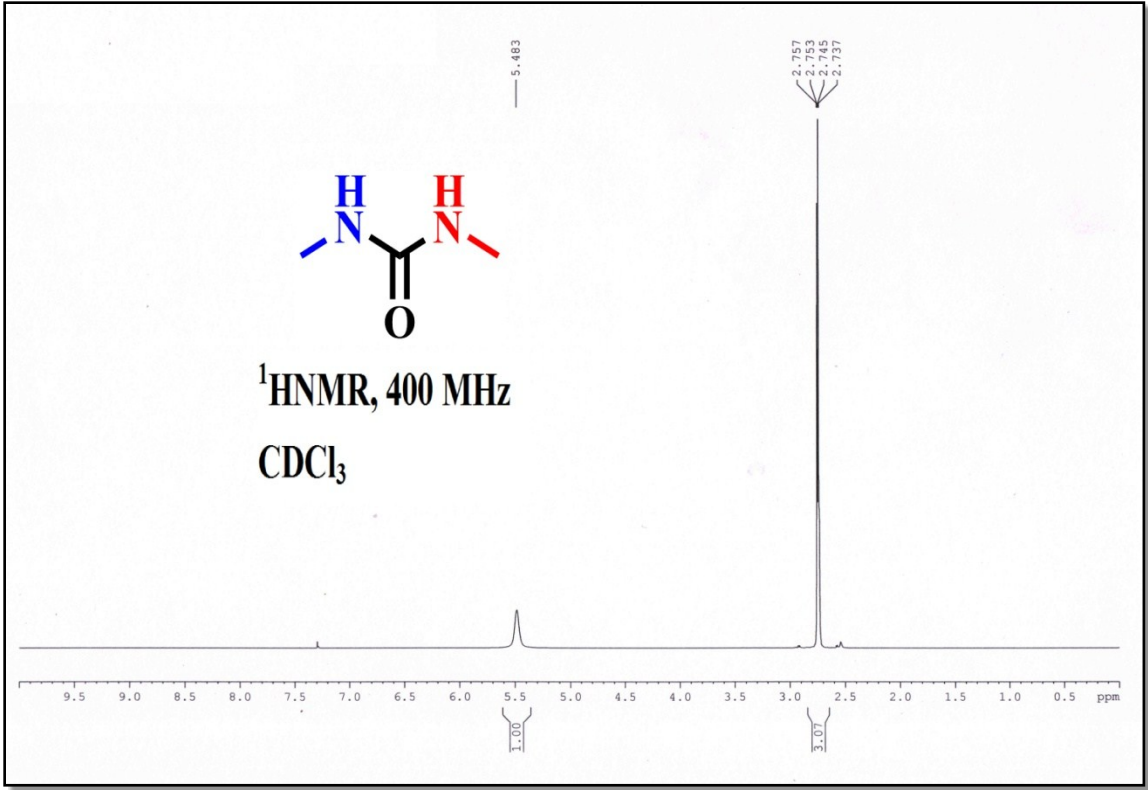

Supplement: c8nj00475g1.pdf [file c8nj00475g1.pdf]
